# Supplementary material for: Effects of Transplanted Heparin-Poloxamer Hydrogel Combining Dental Pulp Stem Cells and bFGF on Spinal Cord Injury Repair
Source: Hindawi journal article supplement (doi:10.1155/2018/2398521), 2018-01-01
Supplement: f1 [file 2398521.f1.pdf]

TABLE Supplementary 1 (S1): Results of pairwise statistical analysis of functional behavioral score between groups

| Day | Group          | SCI | HP  | HP-bFGF | HP-DPSCs | HP-bFGF- DPSCs | sham |
|-----|----------------|-----|-----|---------|----------|----------------|------|
| 1D  | SCI            |     |     |         |          |                | ***  |
|     | HP             |     |     |         |          |                | ***  |
|     | HP-bFGF        |     |     |         |          |                | ***  |
|     | HP-DPSCs       |     |     |         |          |                | ***  |
|     | HP-bFGF- DPSCs |     |     |         |          |                | ***  |
|     | sham           | ### | ### | ###     | ###      | ###            |      |
| 1D  | SCI            |     |     |         |          |                |      |
|     | HP             |     |     |         |          |                |      |
|     | HP-bFGF        |     |     |         |          |                |      |
|     | HP-DPSCs       |     |     |         |          |                |      |
|     | HP-bFGF- DPSCs |     |     |         |          |                |      |
|     | sham           | &&& | &&& | &&&     | &&&      | &&&            |      |
| 3D  | SCI            |     |     |         |          |                | ***  |
|     | HP             |     |     |         |          |                | ***  |
|     | HP-bFGF        |     |     |         |          |                | ***  |
|     | HP-DPSCs       |     |     |         |          |                | ***  |
|     | HP-bFGF- DPSCs |     |     |         |          |                | ***  |
|     | sham           | ### | ### | ###     | ###      | ###            |      |
| 3D  | SCI            |     |     |         |          |                |      |
|     | HP             |     |     |         |          |                |      |
|     | HP-bFGF        |     |     |         |          |                |      |
|     | HP-DPSCs       |     |     |         |          |                |      |
|     | HP-bFGF- DPSCs |     |     |         |          |                |      |
|     | sham           | &&& | &&& | &&&     | &&&      | &&&            |      |
| 7D  | SCI            |     |     | **      | ***      | ***            | ***  |
|     | HP             | ### |     |         | ***      | ***            | ***  |
|     | HP-bFGF        | ### |     |         | ***      | ***            | ***  |
|     | HP-DPSCs       | ### | ### |         |          |                | ***  |
|     | HP-bFGF- DPSCs | ### | ### |         |          |                |      |
|     | sham           | ### | ### | ###     | ###      | ###            |      |
| 7D  | SCI            |     |     |         |          |                |      |
|     | HP             |     |     |         |          |                |      |
|     | HP-bFGF        |     |     |         |          |                |      |
|     | HP-DPSCs       |     |     |         |          |                |      |
|     | HP-bFGF- DPSCs | &&& | &&& | &&&     |          |                |      |
|     | sham           | &&& | &&& | &&&     |          |                |      |
| 14D | SCI            |     | *   | ***     | ***      | ***            | ***  |
|     | HP             | ### |     | ***     | ***      | ***            | ***  |
|     | HP-bFGF        | ### |     |         | **       | **             | ***  |
|     | HP-DPSCs       | ### |     |         |          |                | ***  |
|     | HP-bFGF- DPSCs | ### |     |         |          |                |      |
|     | sham           | ### | ### | ###     | ###      | ###            |      |

|     |                |     |     |     |     |     |     |
|-----|----------------|-----|-----|-----|-----|-----|-----|
| 14D | SCI            |     |     |     |     |     |     |
|     | HP             |     |     |     |     |     |     |
|     | HP-bFGF        | &   |     |     |     |     |     |
|     | HP-DPSCs       | &&& |     |     |     |     |     |
|     | HP-bFGF- DPSCs | &&& |     |     | &&& |     |     |
|     | sham           | &&& | &&& | &&& | &&& | &&& |     |
| 21D | SCI            |     | *   | *** | *** | *** | *** |
|     | HP             |     |     | *** | *** | *** | *** |
|     | HP-bFGF        |     |     |     |     | *** | *** |
|     | HP-DPSCs       | ### |     |     |     | *   | *** |
|     | HP-bFGF- DPSCs | ### |     |     |     |     | *** |
|     | sham           | ### | ### | ### | ### | ### |     |
| 21D | SCI            |     |     |     |     |     |     |
|     | HP             |     |     |     |     |     |     |
|     | HP-bFGF        |     |     |     |     |     |     |
|     | HP-DPSCs       |     |     |     |     |     |     |
|     | HP-bFGF- DPSCs | &&& | &&& | &&& |     |     |     |
|     | sham           | &&& | &&& | &&& | &&& | &&& |     |
| 28D | SCI            |     |     | *** | *** | *** | *** |
|     | HP             |     |     | *** | *** | *** | *** |
|     | HP-bFGF        |     |     |     |     | *** | *** |
|     | HP-DPSCs       |     |     |     |     |     | *   |
|     | HP-bFGF- DPSCs |     |     |     |     |     | *   |
|     | sham           | ### | ### | ### | ### | ### |     |
| 28D | SCI            |     |     |     |     |     |     |
|     | HP             |     |     |     |     |     |     |
|     | HP-bFGF        |     |     |     |     |     |     |
|     | HP-DPSCs       |     |     |     |     |     |     |
|     | HP-bFGF- DPSCs |     |     |     |     |     |     |
|     | sham           | &&& | &&& | &&& | &&& | &&& |     |

BBB scores: \* $p < 0.05$ , \*\* $p < 0.01$ , \*\*\* $p < 0.001$ ; Reuter scores: # $p < 0.05$ , ## $p < 0.01$ , ### $p < 0.001$ ; Angle scores: & $p < 0.05$ , && $p < 0.01$ , &&& $p < 0.001$
